# Supplementary material for: Tree species, tree genotypes and tree genotypic diversity levels affect microbe-mediated soil ecosystem functions in a subtropical forest
Source: PubMed Central journal article supplement (PMC5114573; doi:10.1038/srep36672), 2016-11-18
Supplement: srep36672-s1.pdf [file srep36672-s1.pdf]

## Supplementary Information

### Tree species, tree genotypes and tree genotypic diversity levels affect microbe-mediated soil ecosystem functions in a subtropical forest

Witoon Purahong<sup>1</sup>, Walter Durka<sup>2, 3</sup>, Markus Fischer<sup>4</sup>, Sven Dommert<sup>1</sup>, Ricardo Schöps<sup>1</sup>, François Buscot<sup>1,3</sup>, Tesfaye Wubet<sup>1,3</sup>

#### Affiliations:

<sup>1</sup>UFZ-Helmholtz Centre for Environmental Research, Department of Soil Ecology, Theodor-Lieser-Str. 4, D-06120 Halle (Saale), Germany;

<sup>2</sup>UFZ-Helmholtz Centre for Environmental Research, Department of Community Ecology, Theodor-Lieser-Str. 4, D-06120 Halle (Saale), Germany;

<sup>3</sup>German Centre for Integrative Biodiversity Research (iDiv), Halle-Jena-Leipzig, Deutscher Platz 5e, D-04103 Leipzig, Germany;

<sup>4</sup>Institute of Plant Sciences, University of Bern, Bern, Switzerland.

**Table S1. Experimental design.**

| Tree Species<br>(4)           | Tree genotype<br>(Seed family) (4) | Genetic diversity level<br>(2)                                              | Replicates<br>(4) |
|-------------------------------|------------------------------------|-----------------------------------------------------------------------------|-------------------|
| <i>Alniphyllum fortunei</i>   | DS2, DS101, DS104,<br>DS108,       | Monogenotypic (1 genotype)<br>plot vs. multigenotypic (4<br>genotypes) plot | 4                 |
| <i>Cinnamomum camphora</i>    | D1, D2, D3, D6                     | Monogenotypic (1 genotype)<br>plot vs. multigenotypic (4<br>genotypes) plot | 4                 |
| <i>Daphniphyllum oldhamii</i> | DS5, DS18, DS19, DS21              | Monogenotypic (1 genotype)<br>plot vs. multigenotypic (4<br>genotypes) plot | 4                 |
| <i>Idesia polycarpa</i>       | D3, D5, D10, D12                   | Monogenotypic (1 genotype)<br>plot vs. multigenotypic (4<br>genotypes) plot | 4                 |

**Table S2. Characteristics of selected trees and soil physicochemical and substrate quality.**

| Tree species                  | Seed family | Genetic Diversity level | Mean tree height (cm) | pH   | Total N (%) | Total C (%) | C:N   |
|-------------------------------|-------------|-------------------------|-----------------------|------|-------------|-------------|-------|
| <i>Alniphyllum fortunei</i>   | DS101       | 1                       | 135                   | 3.77 | 0.18        | 2.16        | 12.18 |
| <i>Alniphyllum fortunei</i>   | DS101       | 4                       | 153                   | 3.76 | 0.18        | 2.55        | 14.38 |
| <i>Alniphyllum fortunei</i>   | DS104       | 1                       | 105.5                 | 3.67 | 0.21        | 2.86        | 13.69 |
| <i>Alniphyllum fortunei</i>   | DS104       | 4                       | 135.5                 | 3.78 | 0.17        | 2.65        | 15.30 |
| <i>Alniphyllum fortunei</i>   | DS108       | 1                       | 121.25                | 3.91 | 0.20        | 2.84        | 14.35 |
| <i>Alniphyllum fortunei</i>   | DS108       | 4                       | 187.5                 | 3.69 | 0.19        | 3.18        | 16.45 |
| <i>Alniphyllum fortunei</i>   | DS2         | 1                       | 120.75                | 3.71 | 0.15        | 1.70        | 11.31 |
| <i>Alniphyllum fortunei</i>   | DS2         | 4                       | 129.75                | 3.71 | 0.18        | 2.97        | 16.56 |
| <i>Cinnamomum camphora</i>    | D1          | 1                       | 73                    | 3.98 | 0.18        | 2.36        | 13.32 |
| <i>Cinnamomum camphora</i>    | D1          | 4                       | 59                    | 3.86 | 0.18        | 2.71        | 14.78 |
| <i>Cinnamomum camphora</i>    | D2          | 1                       | 79.5                  | 3.91 | 0.18        | 2.36        | 13.47 |
| <i>Cinnamomum camphora</i>    | D2          | 4                       | 62                    | 3.9  | 0.17        | 2.44        | 14.76 |
| <i>Cinnamomum camphora</i>    | D3          | 1                       | 79                    | 3.86 | 0.18        | 2.70        | 15.07 |
| <i>Cinnamomum camphora</i>    | D3          | 4                       | 63.25                 | 3.78 | 0.20        | 3.21        | 15.98 |
| <i>Cinnamomum camphora</i>    | D6          | 1                       | 72.5                  | 3.78 | 0.16        | 2.33        | 15.06 |
| <i>Cinnamomum camphora</i>    | D6          | 4                       | 67.5                  | 3.8  | 0.22        | 3.26        | 14.88 |
| <i>Daphniphyllum oldhamii</i> | DS18        | 1                       | 115.25                | 3.98 | 0.27        | 3.87        | 14.28 |
| <i>Daphniphyllum oldhamii</i> | DS18        | 4                       | 107                   | 3.95 | 0.16        | 2.38        | 14.50 |
| <i>Daphniphyllum oldhamii</i> | DS19        | 1                       | 111.75                | 3.94 | 0.15        | 2.20        | 14.99 |
| <i>Daphniphyllum oldhamii</i> | DS19        | 4                       | 134.75                | 3.96 | 0.12        | 1.54        | 12.55 |
| <i>Daphniphyllum oldhamii</i> | DS21        | 1                       | 112.25                | 3.86 | 0.18        | 2.36        | 13.49 |
| <i>Daphniphyllum oldhamii</i> | DS21        | 4                       | 116.75                | 3.95 | 0.14        | 1.87        | 13.64 |
| <i>Daphniphyllum oldhamii</i> | DS5         | 1                       | 84                    | 4    | 0.28        | 3.64        | 13.16 |
| <i>Daphniphyllum oldhamii</i> | DS5         | 4                       | 121.25                | 3.98 | 0.17        | 2.55        | 14.75 |
| <i>Idesia polycarpa</i>       | D10         | 1                       | 81.25                 | 3.87 | 0.19        | 2.11        | 11.35 |
| <i>Idesia polycarpa</i>       | D10         | 4                       | 130.5                 | 3.84 | 0.16        | 2.25        | 13.78 |
| <i>Idesia polycarpa</i>       | D12         | 1                       | 169                   | 3.85 | 0.15        | 1.70        | 11.58 |
| <i>Idesia polycarpa</i>       | D12         | 4                       | 74                    | 3.94 | 0.18        | 2.56        | 13.90 |
| <i>Idesia polycarpa</i>       | D3          | 1                       | 124.25                | 3.83 | 0.21        | 3.01        | 14.28 |
| <i>Idesia polycarpa</i>       | D3          | 4                       | 77.75                 | 3.95 | 0.21        | 2.91        | 14.19 |
| <i>Idesia polycarpa</i>       | D5          | 1                       | 93.5                  | 3.69 | 0.19        | 2.60        | 13.47 |
| <i>Idesia polycarpa</i>       | D5          | 4                       | 62.25                 | 3.86 | 0.14        | 2.04        | 14.14 |

**Table S3. Leaf toughness, total phenolics concentration and tannin concentration of tree species used in this experiment.**

| Species                       | Leaf toughness<br>Mean (range) | Total phenolics concentration<br>Mean (range) | Tannin concentration<br>Mean (range) | References              |
|-------------------------------|--------------------------------|-----------------------------------------------|--------------------------------------|-------------------------|
| <i>Alniphyllum fortunei</i>   | 0.20 (0.16 – 0.27)             | 163.90 (139.57 – 194.50)                      | 117.07 (107.21 – 132.84)             | Eichenberg et al., 2015 |
| <i>Cinnamomum camphora</i>    | 0.60 (0.46 – 0.74)             | 25.63 (13.43 - 43.98)                         | 20.84 (13.76 – 28.29)                | Eichenberg et al., 2015 |
| <i>Daphniphyllum oldhamii</i> | 0.54 (0.39 – 0.70)             | 19.86 (11.12 – 25.86)                         | 9.70 (6.07 – 13.16)                  | Eichenberg et al., 2015 |
| <i>Idesia polycarpa</i>       | n.d.                           | n.d.                                          | n.d.                                 |                         |

## **Reference**

Eichenberg D, Purschke O, Ristok C, Wessjohann L, Bruelheide H (2015) Trade-offs between physical and chemical carbon-based leaf defence: of intraspecific variation and trait evolution. *J Ecol* 103:1667–1679.
